1 **Estimates of reduced vaccine effectiveness against hospitalization, infection,**  
2 **transmission and symptomatic disease of a new SARS-CoV-2 variant, Omicron**  
3 **(B.1.1.529), using neutralizing antibody titers**  
4

5 Billy J. Gardner, A. Marm Kilpatrick\*

6 *Department of Ecology and Evolutionary Biology, University of California, Santa Cruz,*  
7 *California, USA*

8 [\\*akilpatr@ucsc.edu](mailto:akilpatr@ucsc.edu)  
9

10 **Abstract**

11 The emergence of the Omicron variant (B.1.1.529) of SARS-CoV-2 has raised concerns  
12 about how mutations in the spike protein might influence immune escape and vaccine  
13 protection against infection and disease, COVID-19. Initial estimates of immune escape  
14 measure neutralizing antibody titers, which have been shown to be a correlate of  
15 protection for COVID-19, but vary among studies. However, no studies have examined  
16 variation in vaccine effectiveness (VE) using estimated reductions in neutralizing  
17 antibody titers across virus variants. We quantified consistency in relative neutralizing  
18 antibody titers across studies. We then examined relationships between variant-specific  
19 reductions in neutralizing antibodies and protection against documented infection,  
20 symptomatic disease, and hospitalizations across variants and vaccines. We found  
21 considerable variation in variant-specific neutralizing antibody titers between studies,  
22 but within-study comparisons across variants were far more robust. There was  
23 insufficient data to estimate VE for a single vaccine across variants, especially for  
24 higher levels of immune evasion (>7-fold reductions in neutralizing antibody titers)  
25 observed with the Omicron variant (40-fold). Instead, we leveraged variation among  
26 both vaccines and virus variants to estimate VE - neutralizing antibody titer relationships  
27 across a 30 to 100-fold range of neutralizing antibody titers reduction. Omicron  
28 increased the risk of hospitalization four to five-fold and increased the risk of  
29 symptomatic disease seven to ten-fold for mRNA vaccinees, with similar relative effects  
30 for recently vaccinated, or individuals with waned antibody titers. Third doses restored  
31 titers and protection to levels similar to waned immunity against Delta. Overall, these  
32 analyses indicate that vaccine effectiveness against severe disease is significantly  
33 diminished for waned individuals, and protection against infection, symptomatic disease  
34 and transmission is nearly eliminated. However, third doses significantly ameliorate  
35 these reductions but only restore protection to levels equivalent to waned protection  
36 against the Delta variant. The invasion of Omicron is likely to result in widespread  
37 infection, and substantial hospitalizations unless widespread boosting of immunity  
38 occurs.  
39

40 **Funding** California Department of Health, National Science Foundation  
41

## 42 **Introduction**

43  
44 The evolution of SARS-CoV-2 in populations with high immunity from infection or  
45 vaccination is likely to lead to new variants with substantial immune escape (1, 2),  
46 including the Omicron variant (B.1.1.529) in November 2021. Determining the extent of  
47 immune evasion on the effectiveness of vaccines is critical both for assessing the need  
48 for new and variant-specific vaccines and additional non-pharmaceutical interventions to  
49 limit spread(3). Traditional vaccine effectiveness studies can be costly and can only be  
50 performed when there is significant transmission of a new variant in a partly vaccinated  
51 population. Delays in implementing interventions until these studies can be performed  
52 can result in rapid growth of a new variant, stress on health-care systems and  
53 preventable disease and death (3).

54  
55 A much quicker way to estimate VE against a new variant is to use a surrogate of  
56 protection, such as neutralizing antibody titers, which can often be measured much  
57 more quickly than performing a traditional VE study. Variation in neutralizing antibody  
58 titers across vaccines are strongly correlated with protection against symptomatic  
59 disease, all infections, and transmission (4-7). Here, we extend this approach and  
60 develop relationships between VE against documented infection, symptomatic disease,  
61 and hospitalization and neutralizing antibody titers. We use these relationships to  
62 estimate the impact of immune evasion, specifically, reductions in neutralizing antibody  
63 titers on VE, including for the Omicron variant.

## 65 **Methods**

### 66 *Reductions in neutralizing antibody titers by variant*

67  
68 We collected data from a recent review (8) on neutralizing antibody titers for four SARS-  
69 CoV-2 variants, Alpha, Beta, Gamma, and Delta (Table S1), and for each vaccine,  
70 normalized by convalescent sera (4). We excluded studies that did not include values  
71 for at least 3 variants because between-study variation was very high (see below). We  
72 divided each estimate by the neutralizing antibody titer for wild-type (WT) SARS-CoV-2  
73 (Wuhan-Hu-1, US-WA1/2020, B, B.1) from each study, to produce a ratio representing  
74 the reduction (expressed as an x-fold difference) between a variant and WT virus. We  
75 estimated the mean differences among variants using a linear model with variant as a  
76 fixed effect (a mixed model with study as a random effect had weaker support; AIC:  
77 0.7). We used these variant-specific reduction in neutralizing antibody levels (relative to  
78 WT) and the neutralizing antibody levels for each vaccine relative to convalescent sera  
79 (4) to estimate a vaccine-variant specific relative neutralizing antibody titer ratio, NATR.

### 80 81 *VE against documented infection, symptomatic disease, and hospitalization*

82  
83 We collected data from the literature (including a systematic living review: (9)) on VE for  
84 COVID-19 and categorized each study by variant type (Alpha, Beta, Gamma, Delta) and  
85 endpoint (hospitalization, symptomatic disease, and documented infection). We  
86 excluded estimates where a dominant variant for the study period was not reported, or  
87 where two variants were circulating and no variant-specific estimate was provided.

88

## 89 Relationships between VE and neutralizing antibody titers by vaccine and variant

90

91 We used generalized linear models with a binomial distribution with a logit link to model  
92 the relationship between variant-specific reductions in neutralizing antibody titers and  
93 VE for each endpoint across all vaccines and variants for each endpoint. We used these  
94 relationships to estimate VE for three endpoints, documented infection, symptomatic  
95 disease, and hospitalization, for the Omicron variant, using a ~40-fold reduction in  
96 neutralizing antibody titers relative to WT (10-12). We also estimated VE for all  
97 infections and transmission given infection using previously identified relationships  
98 between VE and neutralizing antibody titers (5).

99

100 All code and data to replicate the results can be found at  
101 <https://github.com/marmkilpatrick/New-Variant-VE>.

102

103

## 104 Results

105

106 There was enormous variation in the ratios of neutralizing antibody titers to WT (5-10-  
107 fold), but variation among variants in normalized titers was much smaller (Fig 1).  
108 Neutralizing antibody titers relative to WT were 1.86-fold (95% CI: 1.3-2.4) lower for  
109 Alpha, 6.7-fold (95% CI: 5.0-9.1) lower for Beta, 2.3-fold (95% CI: 5.0-9.1) for Gamma,  
110 and 2.7-fold (95% CI: 2.7-5.1) lower for Delta (Fig 1).

111

112

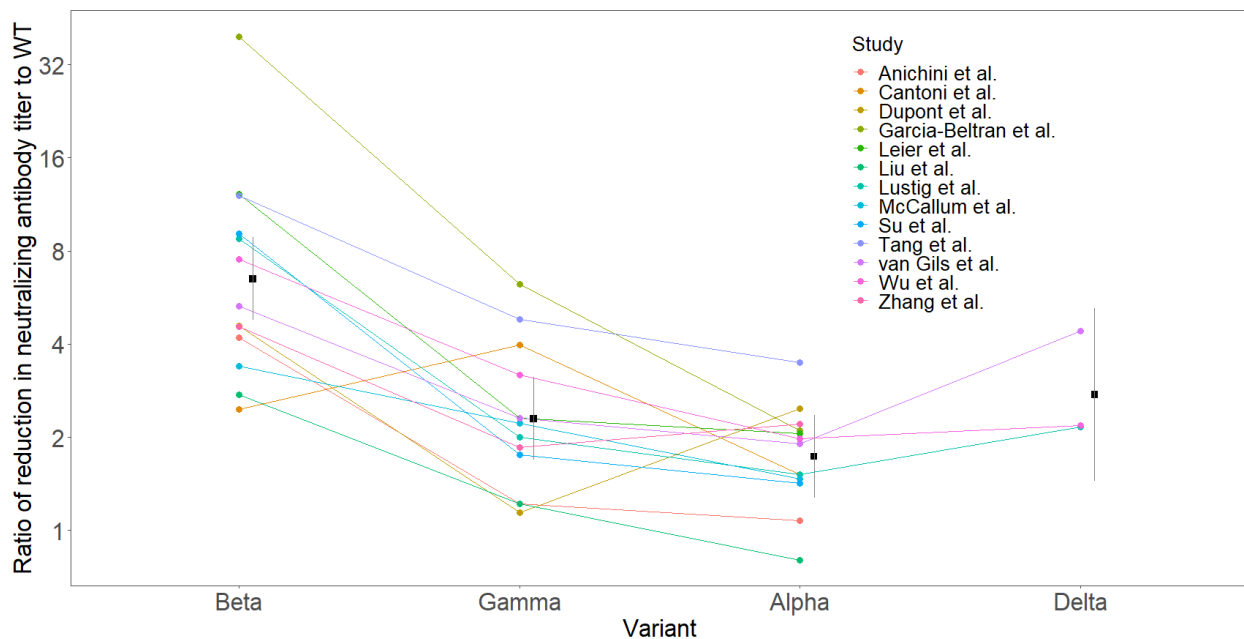

113

114 **Fig 1. Reduction in neutralizing antibody titers plotted against SARS-CoV-2**  
115 **variant. Each point and color show ratio from an individual study, and points from**  
116 **the same study are connected by lines. Black squares and error bars show the**

117 **mean and 95% confidence intervals for each variant. Means and 95% confidence**  
118 **intervals are 1.73 (95% CI 1.27-2.36) for Alpha, 6.50 (95% CI: 4.77-8.85) for Beta,**  
119 **2.74 (95% CI: 1.44-5.22) for Delta, and 2.30 (1.69-3.13) for Gamma.**

120  
121 There were VE estimates for five vaccines against 2 to 4 variants for hospitalization (Fig  
122 2), symptomatic disease (Fig 3), and documented infection (Fig 4). In some cases there  
123 was evidence for reductions in VE with decreasing neutralizing antibody titers, but for  
124 hospitalization and symptomatic disease endpoints the VE estimates for the variant with  
125 the largest reduction in neutralizing antibody titers (Beta) were highly uncertain,  
126 resulting in a vary narrow range of neutralizing antibody titers, and insufficient  
127 information to estimate the VE for Omicron based solely on comparisons within a  
128 vaccine across variants.

129

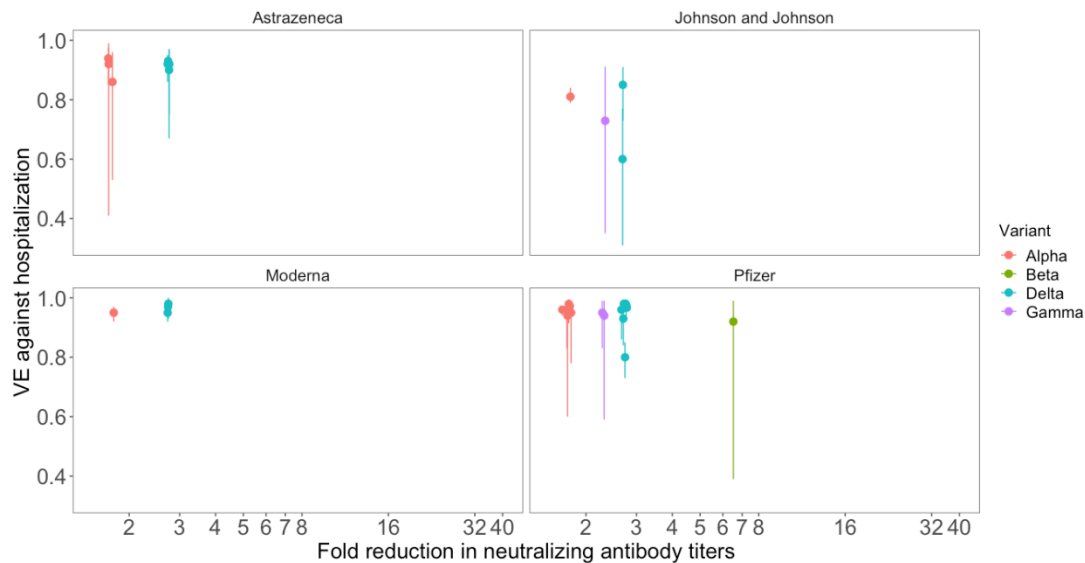

130

131 **Fig 2. VE against hospitalization plotted against variant-specific reductions in**  
132 **neutralizing antibody titers by vaccine. Each point (and 95% CI) represents a**  
133 **single estimate of VE for a single vaccine & virus variant from observational**  
134 **studies. Points have been jittered along the x-axis to facilitate presentation.**

135

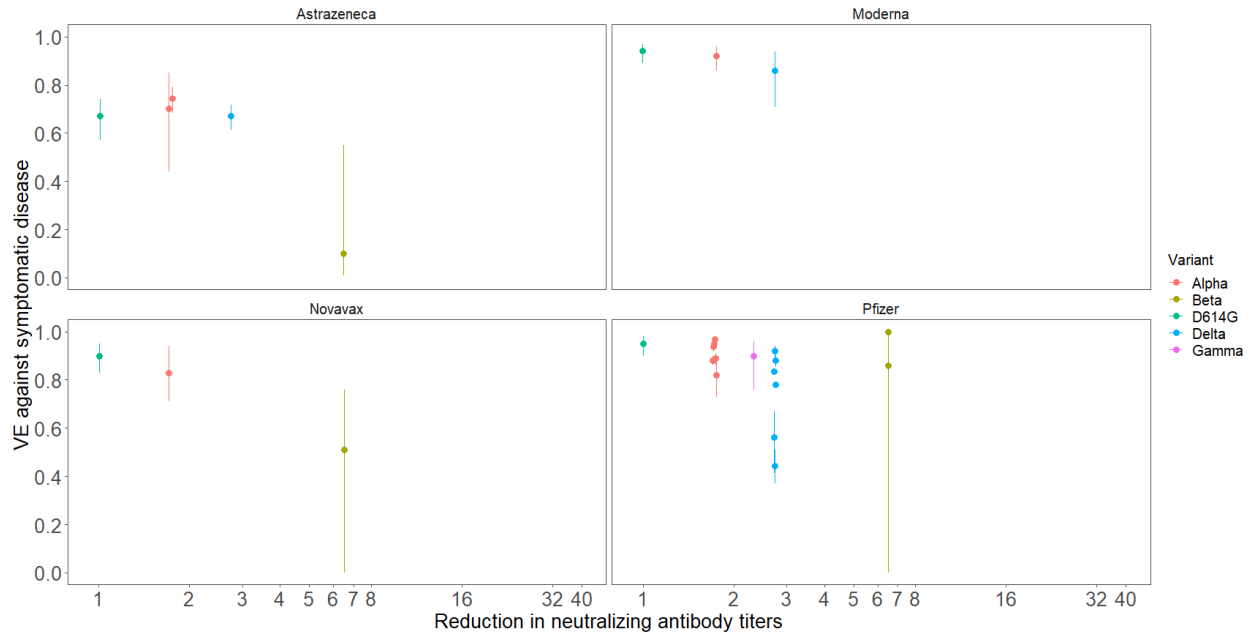

136

137 **Fig 3. VE against symptomatic disease plotted against variant-specific**  
138 **reductions in neutralizing antibody titers by vaccine. Each point (and 95% CI) represents a**  
139 **single estimate of VE for a single vaccine & virus variant from observational**  
140 **studies. Points have been jittered along the x-axis to facilitate presentation.**

141

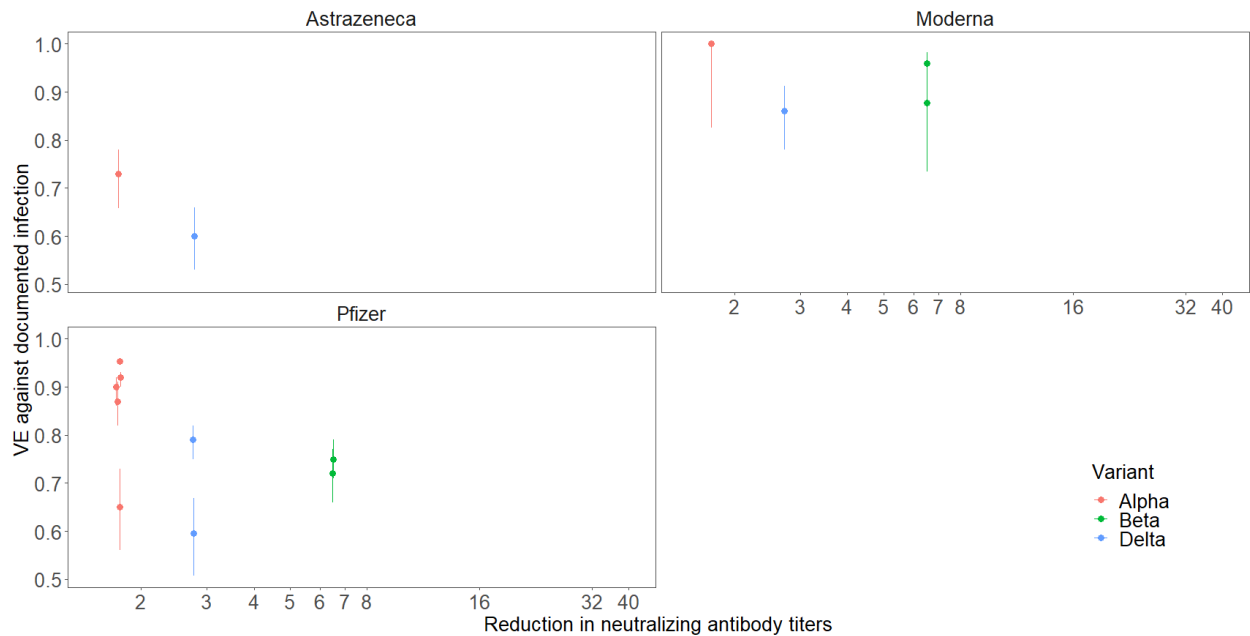

142

143 **Fig 4. VE against documented infection plotted against variant-specific**  
144 **reductions in neutralizing antibody titers by vaccine. Each point (and 95% CI)**  
145 **represents a single estimate of VE for a single vaccine & virus variant from**

146 **observational studies. Points have been jittered along the x-axis to facilitate**  
147 **presentation.**

148 When we analyzed variation in VE with neutralizing antibody titer ratios across both  
149 variants and vaccines there were strong relationships across a 30 to 110-fold range of  
150 neutralizing antibody titers for the three endpoints (Fig 5A-C). Estimated VE against  
151 hospitalization for Omicron was substantially lower than Delta, with relative risk (1-VE)  
152 increasing four to five-fold for both Pfizer and Moderna across all vaccination states  
153 (Table S3; Fig 5). For example, VE was estimated to be 96.3% (95% CI: 96.1-96.6)  
154 against the Delta variant for recently vaccinated Pfizer recipients but 84.9% (95% CI:  
155 83.0-86.6) against the Omicron variant (Table S3; Fig. 5A). Waned VE was 88.8% (95%  
156 CI: 87.7-89.8) for Delta but dropped to an extrapolated 63.1% (95% CI: 56.9-68.9) w/  
157 Omicron. Fortunately, a third Pfizer dose reversed much of the loss in protection and  
158 increased VE to 91.7% (95% CI: 91.0-92.2) against Omicron, which was slightly higher  
159 than waned Pfizer VE against Delta. Relative patterns were similar for Moderna  
160 vaccinees, except VE was a bit higher than Pfizer for recently vaccinated and waned,  
161 but boosting was less effective, resulting in VE being similar for both Omicron and Delta  
162 for Pfizer and Moderna vaccinees.

163  
164 Protection against symptomatic disease showed even larger declines. VE against  
165 symptomatic disease for waned neutralizing antibody titers (which were ~8-fold lower  
166 than titers in recently vaccinated individuals; (5)) with Pfizer or Moderna against  
167 Omicron were far lower than the range of our data and VE was near 0. For recently  
168 vaccinated or boosted vaccinees with Pfizer and Moderna, relative risk increased 4 to  
169 10-fold; e.g. VE was 83.1% (95% CI: 82.9-83.2) against Delta for recently vaccinated  
170 Pfizer recipients but only 21.4% (95% CI: 17.2-26.4) against Omicron (Fig. 2B). Similar  
171 reductions in protection were apparent for documented infections, all infections, and  
172 transmission given infection (Table S3).

173

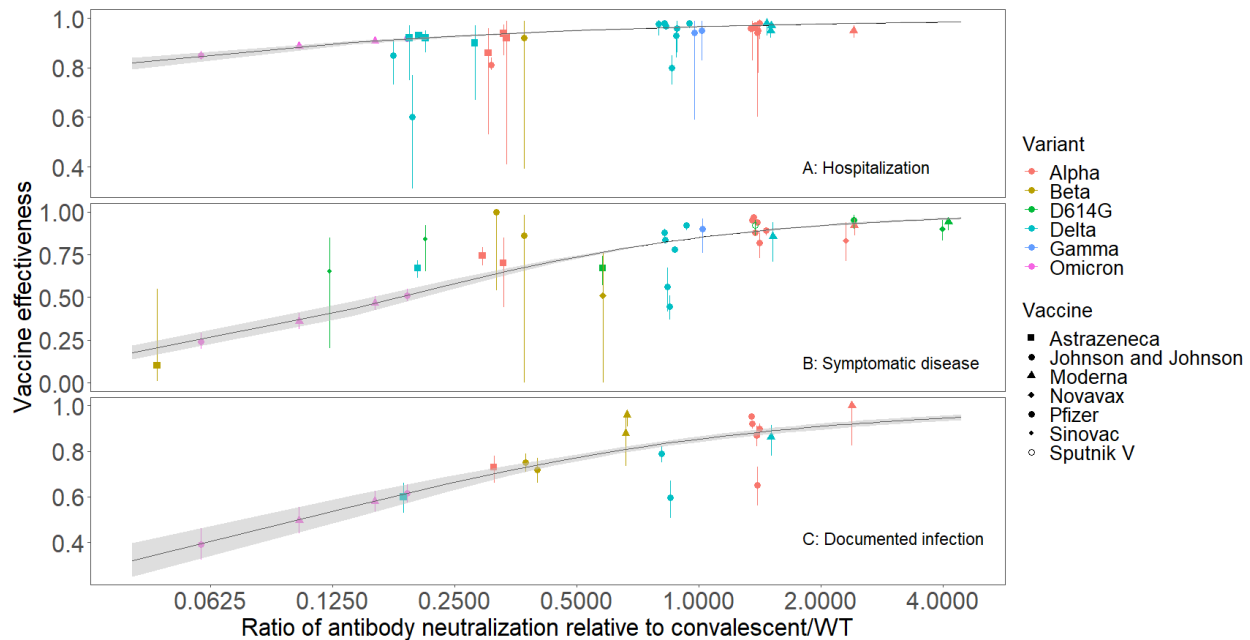

175 **Fig 5. VE against (A) hospitalization and (B) symptomatic disease plotted against**  
176 **variant- and virus-specific neutralizing antibody titer ratios by vaccine. Each point**  
177 **(and 95% CI) represents a single estimate of VE for a single vaccine & virus**  
178 **variant from observational studies. Points have been jittered along the x-axis to**  
179 **facilitate presentation. Lines (and 95% CI ribbons) show fitted logistic regression**  
180 **models.**

181

## 182 Discussion

183

184 The emergence and rapid growth of Omicron, a new variant of SARS-CoV-2 with  
185 numerous known and novel mutations in the spike protein, has created an urgent need  
186 to estimate the impact on protection from vaccines. The fastest way to assess immune  
187 escape is by measuring neutralizing antibody titers with sera from vaccinated  
188 individuals, but translating these data into estimates of VE across variants had yet to be  
189 done. We have shown that ratios of normalized neutralizing antibody titers (normalized  
190 to WT virus) among virus variants are moderately repeatable, despite single estimates  
191 of normalized neutralizing antibody titers vary over an order of magnitude. We also  
192 showed that VE vs hospitalization, symptomatic disease, and documented infection  
193 were strongly correlated with neutralizing antibody titer ratios across a 30 to 100 fold  
194 range of neutralizing antibody titers, but we had to use variation across both vaccines  
195 and variants to span a sizeable range of neutralizing antibody titer.

196

197 We used these relationships to estimate VE for Omicron for vaccinees under a range of  
198 states (recently vaccinated, waned and boosted). The 40-fold estimated reduction in  
199 neutralizing antibody titers for Omicron increased the relative risk of hospitalization four  
200 to five-fold and increased the risk of symptomatic disease seven to ten-fold for mRNA  
201 vaccinees. In contrast, neutralizing antibody titers for individuals that were vaccinated  
202 with mRNA vaccines >4 months ago will have waned ~8-fold (5) and would now be so  
203 low for Omicron (~320-fold lower than recent vaccinees against WT) putting them  
204 outside the range of our data, and indicating very substantial reductions in VE for  
205 hospitalization, and nearly zero protection against symptomatic disease, and  
206 documented infection. Boosting neutralizing antibody titers with a third dose of mRNA  
207 vaccines increased titers substantially, especially compared to waned levels (5), and  
208 restored protection back to waned levels against the Delta variant.

209

210 These results should be interpreted in the context of several important caveats. First,  
211 and foremost, neutralizing antibody titers are a surrogate for VE, and despite strong  
212 correlations between VE and neutralizing antibody titers (4-7), direct studies of VE are  
213 critical to determine the full extent of immune evasion of new variants. Specifically, our  
214 analyses assume that differences in disease severity of variants are correlated with  
215 differences in neutralizing antibody titers. Whether this will hold across the 40-fold  
216 reduction in neutralizing antibody titers is highly uncertain. Second, the extent of  
217 Omicron immune evasion is so large relative to previous variants (40-fold vs 7-fold for  
218 Beta), and VE estimates for the next most evasive variant, Beta, were so uncertain that  
219 we were unable to estimate vaccine-specific models to estimate VE for Omicron.  
220 Instead we assumed that differences in neutralizing antibody titers across vaccines and

221 variants are suitable for estimating VE across variants. Third, the 40-fold reduction that  
222 we used for Omicron required extrapolation well outside of available data and prevented  
223 us from providing reliable VE estimates for Omicron for vaccinees with waned immunity.

224  
225 The Omicron variant of SARS-CoV-2 has grown rapidly in many countries. We have  
226 shown that the approximately 40-fold reduction in neutralizing antibody titers greatly  
227 erodes vaccine protection and increases the relative risk of infection and symptomatic  
228 disease more than four-fold and hospitalization two-fold. As a result, this variant is likely  
229 to spread much more quickly than the Delta variant, especially in highly immunized  
230 populations. The most promising tool to mitigate this reduction in protection is third  
231 doses.

232

233

## 234 **References**

- 235 1. Saad-Roy CM, Morris SE, Metcalf CJE, Mina MJ, Baker RE, Farrar J, et al. Epidemiological and  
236 evolutionary considerations of SARS-CoV-2 vaccine dosing regimes. *Science*. 2021;372(6540):363-70.
- 237 2. Wagner CE, Saad-Roy CM, Morris SE, Baker RE, Mina MJ, Farrar J, et al. Vaccine nationalism and  
238 the dynamics and control of SARS-CoV-2. *Science*. 2021;373(6562):eabj7364.
- 239 3. Sonabend R, Whittles LK, Imai N, Perez-Guzman PN, Knock ES, Rawson T, et al. Non-  
240 pharmaceutical interventions, vaccination, and the SARS-CoV-2 delta variant in England: a mathematical  
241 modelling study. *The Lancet*. 2021.
- 242 4. Khoury DS, Cromer D, Reynaldi A, Schlub TE, Wheatley AK, Juno JA, et al. Neutralizing antibody  
243 levels are highly predictive of immune protection from symptomatic SARS-CoV-2 infection. *Nat Med*.  
244 2021:1-7.
- 245 5. Gardner BJ, Kilpatrick AM. Third doses of COVID-19 vaccines reduce infection and transmission  
246 of SARS-CoV-2 and could prevent future surges in some populations: a modeling study. *medRxiv*.  
247 2021:2021.10.25.21265500.
- 248 6. Cohen JA, Stuart RM, Rosenfeld K, Lyons H, White M, Kerr CC, et al. Quantifying the role of  
249 naturally- and vaccine-derived neutralizing antibodies as a correlate of protection against COVID-19  
250 variants. *medRxiv*. 2021:2021.05.31.21258018.
- 251 7. van Gils MJ, Lavell AHA, van der Straten K, Appelman B, Bontjer I, Poniman M, et al. Four SARS-  
252 CoV-2 vaccines induce quantitatively different antibody responses against SARS-CoV-2 variants.  
253 *medRxiv*. 2021:2021.09.27.21264163.
- 254 8. Chen X, Chen Z, Azman AS, Sun R, Lu W, Zheng N, et al. Neutralizing antibodies against severe  
255 acute respiratory syndrome coronavirus 2 (SARS-CoV-2) variants induced by natural infection or  
256 vaccination: a systematic review and pooled analysis. *Clin Infect Dis*. 2021.
- 257 9. Higdon MM, Wahl B, Jones CB, Rosen JG, Truelove SA, Baidya A, et al. A systematic review of  
258 COVID-19 vaccine efficacy and effectiveness against SARS-CoV-2 infection and disease. *medRxiv*.  
259 2021:2021.09.17.21263549.
- 260 10. Cele S, Jackson L, Khan K, Khoury DS, Moyo-Gwete T, Tegally H, et al. SARS-CoV-2 Omicron has  
261 extensive but incomplete escape of Pfizer BNT162b2 elicited neutralization and requires ACE2 for  
262 infection. *medRxiv*. 2021:2021.12.08.21267417.
- 263 11. Sheward DJ, Kim C, Pankow A, Dopico XC, Martin D, Dillner J, et al. Preliminary Report - Early  
264 release, subject to modification Quantification of the neutralization resistance of the Omicron Variant of  
265 Concern. <https://drive.google.com/file/d/1CuxmNYj5cpluxWXhjjVmuDqntxXwlfXQ/view>. 2021.



266 12. Wilhelm A, Widera M, Grikscheit K, Toptan T, Schenk B, Pallas C, et al. Reduced Neutralization of  
267 SARS-CoV-2 Omicron Variant by Vaccine Sera and monoclonal antibodies. medRxiv.  
268 2021:2021.12.07.21267432.

269

270

271 **Supplemental Tables**

272 **Table S1. Ratio of neutralizing antibody titers relative to wild-type SARS-CoV-2,**  
 273 **obtainted from (8).**

| Study (8)             | Alpha                         | Beta                           | Delta            | Gamma                           |
|-----------------------|-------------------------------|--------------------------------|------------------|---------------------------------|
| Anichini et al.       | 1.1                           | 4.2                            | -                | 1.2                             |
| Cantoni et al.        | 1.6, 1.5                      | 1.5, 3.4                       | -                | 3.5, 4.4                        |
| Dupont et al.         | 2.8, 3, 2.2, 2.1,<br>1.8, 2.9 | 7.2, 5.3, 3.5, 2.7,<br>2.7,6.7 | -                | 1.1, 1.2, 1.2, 1,1.<br>1.0, 1.2 |
| Garcia-Beltran et al. | 2.1                           | 34.5, 41.2, 42.4               | -                | 6.7                             |
| Leier et al.          | 2.6, 1.5                      | 12.2                           | -                | 3.4, 1.3                        |
| Liu et al.            | 0.8                           | 2.7                            | -                | 1.2                             |
| Lustig et al.         | 1.5                           | 8.8                            | 4.3              | 2                               |
| McCallum et al.       | 1.3, 1.2, 1.9                 | 3.7, 2.1, 4.4                  | -                | 2.1,1.2, 3.3                    |
| Su et al.             | 1.4                           | 9.1                            | -                | 1.8                             |
| Tang et al.           | 3.5                           | 12.1                           | -                | 4.8                             |
| van Gils et al.       | 1.9                           | 5.3                            | 4.4              | 2.3                             |
| Wu et al. a           | 1.2, 2.8                      | 6.8, 7.3, 8.4                  | 3.3, 2.1,<br>1.1 | 3.2                             |
| Zhang et al.          | 2.2                           | 4.6                            | -                | 1.9                             |

274

275

276

**Table S2. Vaccine effectiveness estimates obtained from (9).**

| Study             | Country | Study design       | Variant | History of COVID | Vaccine     | Endpoint        | VE    | (95% CI)      | Days post final dose | Effective sample size |
|-------------------|---------|--------------------|---------|------------------|-------------|-----------------|-------|---------------|----------------------|-----------------------|
| Polinski et al.   | USA     | Retrospective      | Alpha   | Excluded         | J&J         | Hospitalization | 0.81  | (0.79-0.84)   | 14+                  | 1000                  |
| Skowronski et al. | Canada  | Test-Negative      | Alpha   | Excluded         | Pfizer      | Hospitalization | 0.96  | (0.83-0.99)   | 14+                  | 30                    |
| Andrews et al.    | England | Test-Negative      | Alpha   | Excluded         | Pfizer      | Hospitalization | 0.979 | (0.914-0.995) | 14+                  | 40                    |
| Andrews et al.    | England | Test-Negative      | Alpha   | Excluded         | Astrazeneca | Hospitalization | 0.939 | (0.849-0.975) | 14+                  | 62                    |
| Stowe             | UK      | Test-Negative      | Alpha   | Unknown          | Pfizer      | Hospitalization | 0.95  | (0.78-0.99)   | 14+                  | 25                    |
| Stowe             | UK      | Test-Negative      | Alpha   | Unknown          | Astrazeneca | Hospitalization | 0.86  | (0.53-0.96)   | 14+                  | 10                    |
| Haas et al.       | Israel  | Retrospective      | Alpha   | Excluded         | Pfizer      | Hospitalization | 0.972 | (0.968-0.975) | 7+                   | 9400                  |
| Martinez-Bas      | Spain   | Prospective Cohort | Alpha   | Excluded         | Pfizer      | Hospitalization | 0.94  | (0.6-0.99)    | 14+                  | 7                     |

|                     |         |                      |       |          |             |                          |       |               |     |      |
|---------------------|---------|----------------------|-------|----------|-------------|--------------------------|-------|---------------|-----|------|
| Nasreen et al.      | Canada  | Test-Negative        | Alpha | Excluded | Pfizer      | Hospitalization or Death | 0.96  | (0.92-0.97)   | 14+ | 700  |
| Nasreen et al.      | Canada  | Test-Negative        | Alpha | Excluded | Moderna     | Hospitalization or Death | 0.95  | (0.41-0.99)   | 14+ | 300  |
| Nasreen et al.      | Canada  | Test-Negative        | Alpha | Excluded | Astrazeneca | Hospitalization or Death | 0.92  | (0.967-0.972) | 14+ | 4    |
| Haas et al.         | Israel  | Retrospective cohort | Alpha | Excluded | Pfizer      | Symptomatic disease      | 0.97  | (0.73-0.88)   | 7+  | 1760 |
| Martinez-Bas et al. | Spain   | Prospective cohort   | Alpha | Excluded | Pfizer      | Symptomatic disease      | 0.82  | (0.86-0.9)    | 14+ | 109  |
| Nasreen et al.      | Canada  | Test-Negative        | Alpha | Excluded | Pfizer      | Symptomatic disease      | 0.88  | (0.916-0.953) | 14+ | 900  |
| Lopez-Bernal et al. | UK      | Test-Negative        | Alpha | Excluded | Pfizer      | Symptomatic disease      | 0.937 | (0.938-0.959) | 14+ | 693  |
| Andrews et al.      | England | Test-Negative        | Alpha | Excluded | Pfizer      | Symptomatic disease      | 0.95  | (0.39-0.99)   | 14+ | 1800 |
| Nasreen et al.      | Canada  | Test-Negative        | Beta  | Excluded | Pfizer      | Hospitalization or Death | 0.92  | (0.86-0.99)   | 14+ | 4    |
| Nasreen et al.      | Canada  | Test-Negative        | Beta  | Excluded | Pfizer      | Symptomatic disease      | 0.86  | (0.75-0.97)   | 14+ | 1    |

|                   |         |               |       |          |             |                 |       |               |     |      |
|-------------------|---------|---------------|-------|----------|-------------|-----------------|-------|---------------|-----|------|
| Polinski et al.   | USA     | Retrospective | Delta | Excluded | J&J         | Hospitalization | 0.85  | (0.949-0.957) | 14+ | 65   |
| Grannis et al.    | USA     | Test-Negative | Delta | Included | J&J         | Hospitalization | 0.6   | (0.9-0.93)    | 14+ | 11   |
| Grannis et al.    | USA     | Test-Negative | Delta | Included | Pfizer      | Hospitalization | 0.8   | (0.86-0.92)   | 14+ | 190  |
| Grannis et al.    | USA     | Test-Negative | Delta | Included | Moderna     | Hospitalization | 0.95  | (0.82-0.91)   | 14+ | 300  |
| Skowronski et al. | Canada  | Test-Negative | Delta | Excluded | Pfizer      | Hospitalization | 0.98  | (0.66-0.78)   | 14+ | 3230 |
| Skowronski et al. | Canada  | Test-Negative | Delta | Excluded | Moderna     | Hospitalization | 0.97  | (0.56-0.73)   | 14+ | 1200 |
| Skowronski et al. | Canada  | Test-Negative | Delta | Excluded | Astrazeneca | Hospitalization | 0.92  | (0.909-0.982) | 14+ | 160  |
| Andrews et al.    | England | Test-Negative | Delta | Excluded | Pfizer      | Hospitalization | 0.967 | (0.734-0.955) | 14+ | 8500 |
| Andrews et al.    | England | Test-Negative | Delta | Excluded | Astrazeneca | Hospitalization | 0.93  | (0.71-0.79)   | 14+ | 8000 |
| Tartof et al.     | USA     | Retrospective | Delta | Included | Pfizer      | Hospitalization | 0.93  | (0.66-0.77)   | 7+  | 80   |

|                     |         |               |       |          |             |                          |       |               |     |        |
|---------------------|---------|---------------|-------|----------|-------------|--------------------------|-------|---------------|-----|--------|
| Bruxvoort et al.    | USA     | Test-Negative | Delta | Unknown  | Pfizer      | Hospitalization          | 0.976 | (0.414-0.672) | 14+ | 100    |
| Stowe               | UK      | Test-Negative | Delta | Unknown  | Pfizer      | Hospitalization          | 0.96  | (0.78-0.913)  | 14+ | 40     |
| Stowe               | UK      | Test-Negative | Delta | Unknown  | Astrazeneca | Hospitalization          | 0.92  | (0.75-0.82)   | 14+ | 25     |
| Nasreen et al.      | Canada  | Test-Negative | Delta | Excluded | Pfizer      | Hospitalization or Death | 0.98  | (0.53-0.66)   | 14+ | 400    |
| Nasreen et al.      | Canada  | Test-Negative | Delta | Excluded | Moderna     | Hospitalization or Death | 0.98  | (0.507-0.669) | 14+ | 100    |
| Nasreen et al.      | Canada  | Test-Negative | Delta | Excluded | Astrazeneca | Hospitalization or Death | 0.9   | (0.71-0.94)   | 14+ | 15     |
| Nasreen et al.      | Canada  | Test-Negative | Delta | Excluded | Pfizer      | Symptomatic disease      | 0.92  | (0.44-0.85)   | 14+ | 485    |
| Lopez-Bernal et al. | UK      | Test-Negative | Delta | Excluded | Pfizer      | Symptomatic disease      | 0.88  | (0.54-1)      | 14+ | 715    |
| Tang et al.         | Qatar   | Test-Negative | Delta | Included | Pfizer      | Symptomatic disease      | 0.444 | (0.41-0.79)   | 14+ | 205    |
| Andrews et al.      | England | Test-Negative | Delta | Excluded | Pfizer      | Symptomatic disease      | 0.835 | (0-0.76)      | 14+ | 235000 |

|                           |          |                            |       |          |             |                          |       |              |     |       |
|---------------------------|----------|----------------------------|-------|----------|-------------|--------------------------|-------|--------------|-----|-------|
| Nordstrom et al.          | Sweden   | Retrospective cohort       | Delta | Excluded | Pfizer      | Symptomatic disease      | 0.78  | (-0.77-0.55) | 14+ | 26500 |
| Skowronski et al.         | Canada   | Test-Negative              | Gamma | Excluded | Pfizer      | Hospitalization          | 0.95  | (0.86-0.95)  | 14+ | 30    |
| Ranzani et al.            | Brazil   | Test-Negative              | Gamma | Excluded | J&J         | Hospitalization          | 0.729 | 0.351        | 28+ |       |
| Nasreen et al.            | Canada   | Test-Negative              | Gamma | Excluded | Pfizer      | Hospitalization or Death | 0.94  | 0.59         | 14+ | 7     |
| Nasreen et al.            | Canada   | Test-Negative              | Gamma | Excluded | Pfizer      | Symptomatic disease      | 0.9   | 0.76         | 14+ | 50    |
| Nasreen                   | Canada   | Test negative case-control | Alpha | unknown  | Moderna     | Symptomatic disease      | 0.92  | (0-0.98)     | 7+  | 127   |
| Nasreen                   | Canada   | Test negative case-control | Alpha | unknown  | Pfizer      | Symptomatic disease      | 0.89  | (0.73-0.91)  | 7+  | 600   |
| Lopez Bernal <sup>2</sup> | UK       | Test negative case-control | Alpha | excluded | Astrazeneca | Symptomatic disease      | 0.745 | (0.73-0.85)  | 14+ | 262   |
| Chemaitelly               | Qatar    | Retrospective cohort       | Alpha | excluded | Moderna     | infection                | 1     | (0.97-0.98)  | 14+ | 19    |
| Haas                      | Israel   | Retrospective cohort       | Alpha | excluded | Pfizer      | infection                | 0.953 | (0.96-0.98)  | >7  | 8976  |
| Sheikh                    | Scotland | Test negative case-control | Alpha | unknown  | Pfizer      | infection                | 0.92  | (0.86-0.95)  | 14+ | 1191  |

|                           |          |                            |       |          |             |                     |       |               |     |     |
|---------------------------|----------|----------------------------|-------|----------|-------------|---------------------|-------|---------------|-----|-----|
| Abu-Raddad                | Qatar    | Test negative case-control | Alpha | unknown  | Pfizer      | infection           | 0.9   | (0.963-0.97)  | >14 | 385 |
| Abu-Raddad                | Qatar    | Retrospective cohort       | Alpha | unknown  | Pfizer      | infection           | 0.87  | (0.924-0.935) | >14 | 209 |
| Sheikh                    | Scotland | Test negative case-control | Alpha | unknown  | Astrazeneca | infection           | 0.73  | (0.84-0.96)   | 14+ | 223 |
| Martinez-Baz              | Spain    | Prospective cohort         | Alpha | excluded | Pfizer      | infection           | 0.65  | (0.928-0.992) | 14+ | 126 |
| Chemaitelly               | Qatar    | Test negative case-control | Beta  | unknown  | Moderna     | infection           | 0.96  | (0.853-0.901) | 14+ | 122 |
| Chemaitelly               | Qatar    | Retrospective cohort       | Beta  | excluded | Moderna     | infection           | 0.878 | (0.37-0.509)  | 14+ | 41  |
| Abu-Raddad                | Qatar    | Test negative case-control | Beta  | unknown  | Pfizer      | infection           | 0.75  | (0.833-0.836) | >14 | 459 |
| Abu-Raddad                | Qatar    | Retrospective cohort       | Beta  | unknown  | Pfizer      | infection           | 0.72  | (0.78-0.79)   | >14 | 261 |
| Tang                      | Qatar    | Test negative case-control | Delta | included | Moderna     | Symptomatic disease | 0.858 | (0.55-0.75)   | 14+ | 39  |
| Lopez Bernal <sup>2</sup> | UK       | Test negative case-control | Delta | excluded | Astrazeneca | Symptomatic disease | 0.67  | (0.57-0.74)   | 14+ | 314 |



|        |              |                            |       |          |             |                     |       |             |     |     |
|--------|--------------|----------------------------|-------|----------|-------------|---------------------|-------|-------------|-----|-----|
| Tang   | Qatar        | Test negative case-control | Delta | included | Pfizer      | Symptomatic disease | 0.561 | (0.65-0.92) | 14+ | 55  |
| Tang   | Qatar        | Test negative case-control | Delta | included | Moderna     | infection           | 0.861 | (0.2-0.85)  | 14+ | 117 |
| Sheikh | Scotland     | Test negative case-control | Delta | unknown  | Pfizer      | infection           | 0.79  | (0.89-0.97) | 14+ | 520 |
| Sheikh | Scotland     | Test negative case-control | Delta | unknown  | Astrazeneca | infection           | 0.6   | (0.83-0.95) | 14+ | 233 |
| Tang   | Qatar        | Test negative case-control | Delta | included | Pfizer      | infection           | 0.596 | (0.9-0.98)  | 14+ | 148 |
| Heath  | UK           | Clinical Trial             | Alpha | unknown  | Novavax     | Symptomatic disease | 0.83  | (0.31-0.77) | 7+  | 40  |
| Emary  | UK           | Clinical Trial             | Alpha | unknown  | Astrazeneca | Symptomatic disease | 0.7   | (0.92-0.97) | 14+ | 24  |
| Thomas | South Africa | Clinical Trial             | Beta  | unknown  | Pfizer      | Symptomatic disease | 1     | (0.96-0.99) | 7+  | 6   |
| Sadoff | South Africa | Clinical Trial             | Beta  | unknown  | J&J         | Symptomatic disease | 0.64  | (0.93-1)    | 28+ | 26  |
| Shinde | South Africa | Clinical Trial             | Beta  | unknown  | Novavax     | Symptomatic disease | 0.51  | (0.67-0.97) | 7+  | 6   |

|               |              |                |       |         |             |                     |      |               |     |     |
|---------------|--------------|----------------|-------|---------|-------------|---------------------|------|---------------|-----|-----|
| Madhi         | South Africa | Clinical Trial | Beta  | unknown | Astrazeneca | Symptomatic disease | 0.1  | (0.89-0.94)   | 14+ | 1   |
| Sadoff        | Global       | Clinical Trial | D614G | unknown | J&J         | Symptomatic disease | 0.66 | (0.83-0.99)   | 28+ | 91  |
| Voysey        | Global       | Clinical Trial | D614G | unknown | Astrazeneca | Symptomatic disease | 0.67 | (0.351-0.911) | 14+ | 123 |
| Tanriover     | Turkey       | Clinical Trial | D614G | unknown | Sinovac     | Symptomatic disease | 0.84 | (0.59-0.99)   | 14+ | 30  |
| Soeriaatmadja | Indonesia    | Clinical Trial | D614G | unknown | Sinovac     | Symptomatic disease | 0.65 | (0.76-0.96)   | 14+ | 9   |
| Baden         | USA          | Clinical Trial | D614G | unknown | Moderna     | Symptomatic disease | 0.94 | (0.86-0.96)   | 14+ | 134 |
| Novavax       | USA, Mexico  | Clinical Trial | D614G | unknown | Novavax     | Symptomatic disease | 0.9  | (0.86-0.91)   | 7+  | 103 |
| Polack        | Global       | Clinical Trial | D614G | unknown | Pfizer      | Symptomatic disease | 0.95 | (0.684-0.794) | 7+  | 200 |
| Logunov       | Russia       | Clinical Trial | D614G | unknown | Sputnik V   | Symptomatic disease | 0.92 | (0.825-1)     | 21+ | 140 |

**Table S3. Predicted VE values for Delta and Omicron variants by vaccine, vaccination status (two-dose, waned, or boosted), and endpoint (“All infections” and “Transmission” are based on analyses from (5); all others are from Figure 5). Rows in italics are substantial extrapolations beyond the range of neutralizing antibody data and should be interpreted with extreme caution.**

| Vaccine        | Endpoint              | Variant        | Dose         | VE (95% CI)             |
|----------------|-----------------------|----------------|--------------|-------------------------|
| <i>Pfizer</i>  | <i>All infections</i> | <i>Delta</i>   | <i>Waned</i> | <i>39.6 (34.6-44.8)</i> |
| Pfizer         | All infections        | Delta          | Two dose     | 77.7 (76.4-78.9)        |
| Pfizer         | All infections        | Delta          | Boosted      | 89.9 (89.1-90.6)        |
| <i>Moderna</i> | <i>All infections</i> | <i>Delta</i>   | <i>Waned</i> | <i>49.6 (45.3-54)</i>   |
| Moderna        | All infections        | Delta          | Two dose     | 84.4 (83.6-85.2)        |
| Moderna        | All infections        | Delta          | Boosted      | 88.5 (87.7-89.2)        |
| <i>Pfizer</i>  | <i>All infections</i> | <i>Omicron</i> | <i>Waned</i> | <i>7.1 (4.8-10.5)</i>   |
| Pfizer         | All infections        | Omicron        | Two dose     | 29. (24-34.6)           |
| Pfizer         | All infections        | Omicron        | Boosted      | 51 (46.7-55.2)          |
| <i>Moderna</i> | <i>All infections</i> | <i>Omicron</i> | <i>Waned</i> | <i>10.4 (7.3-14.5)</i>  |
| Moderna        | All infections        | Omicron        | Two dose     | 38.9 (33.9-44.1)        |
| Moderna        | All infections        | Omicron        | Boosted      | 47.3 (42.8-51.9)        |
| Pfizer         | Documented infection  | Delta          | Waned        | 50.5 (44.8-56.2)        |
| Pfizer         | Documented infection  | Delta          | Two dose     | 83.9 (82.6-85.1)        |
| Pfizer         | Documented infection  | Delta          | Boosted      | 92.8 (91.4-94)          |
| Moderna        | Documented infection  | Delta          | Waned        | 60.3 (56.1-64.4)        |
| Moderna        | Documented infection  | Delta          | Two dose     | 88.9 (87.6-90.2)        |

|                |                             |                |              |                         |
|----------------|-----------------------------|----------------|--------------|-------------------------|
| Moderna        | Documented infection        | Delta          | Boosted      | 91.8 (90.4-93.1)        |
| <i>Pfizer</i>  | <i>Documented infection</i> | <i>Omicron</i> | <i>Waned</i> | <i>11.2 (6.8-17.8)</i>  |
| Pfizer         | Documented infection        | Omicron        | Two dose     | 39.1 (32.3-46.3)        |
| Pfizer         | Documented infection        | Omicron        | Boosted      | 61.5 (57.5-65.4)        |
| <i>Moderna</i> | <i>Documented infection</i> | <i>Omicron</i> | <i>Waned</i> | <i>15.7 (10.4-23.2)</i> |
| Moderna        | Documented infection        | Omicron        | Two dose     | 49.8 (44-55.6)          |
| Moderna        | Documented infection        | Omicron        | Boosted      | 58.1 (53.5-62.6)        |
| Pfizer         | Hospitalization             | Delta          | Waned        | 88.8 (87.7-89.8)        |
| Pfizer         | Hospitalization             | Delta          | Two dose     | 96.3 (96.1-96.5)        |
| Pfizer         | Hospitalization             | Delta          | Boosted      | 98.1 (97.8-98.3)        |
| Moderna        | Hospitalization             | Delta          | Waned        | 91.4 (90.7-92)          |
| Moderna        | Hospitalization             | Delta          | Two dose     | 97.3 (97.1-97.5)        |
| Moderna        | Hospitalization             | Delta          | Boosted      | 97.9 (97.6-98.1)        |
| <i>Pfizer</i>  | <i>Hospitalization</i>      | <i>Omicron</i> | <i>Waned</i> | <i>63.1 (56.9-68.9)</i> |
| Pfizer         | Hospitalization             | Omicron        | Two dose     | 85 (83.1-86.6)          |
| Pfizer         | Hospitalization             | Omicron        | Boosted      | 91.7 (91.1-92.3)        |
| <i>Moderna</i> | <i>Hospitalization</i>      | <i>Omicron</i> | <i>Waned</i> | <i>69.6 (64.6-74.2)</i> |
| Moderna        | Hospitalization             | Omicron        | Two dose     | 88.6 (87.5-89.6)        |
| Moderna        | Hospitalization             | Omicron        | Boosted      | 90.9 (90.1-91.5)        |
| Pfizer         | Symptomatic disease         | Delta          | Waned        | 36.8 (32.4-41.5)        |

|                |                            |                |              |                      |
|----------------|----------------------------|----------------|--------------|----------------------|
| Pfizer         | Symptomatic disease        | Delta          | Two dose     | 83.1 (82.9-83.2)     |
| Pfizer         | Symptomatic disease        | Delta          | Boosted      | 94.2 (93.6-94.7)     |
| Moderna        | Symptomatic disease        | Delta          | Waned        | 49.5 (45.8-53.2)     |
| Moderna        | Symptomatic disease        | Delta          | Two dose     | 89.6 (89.1-90.1)     |
| Moderna        | Symptomatic disease        | Delta          | Boosted      | 93.1 (92.5-93.6)     |
| <i>Pfizer</i>  | <i>Symptomatic disease</i> | <i>Omicron</i> | <i>Waned</i> | <i>3.6 (2.4-5.6)</i> |
| Pfizer         | Symptomatic disease        | Omicron        | Two dose     | 24.1 (19.9-29.)      |
| Pfizer         | Symptomatic disease        | Omicron        | Boosted      | 51.2 (47.7-54.7)     |
| <i>Moderna</i> | <i>Symptomatic disease</i> | <i>Omicron</i> | <i>Waned</i> | <i>6 (4.1-8.6)</i>   |
| Moderna        | Symptomatic disease        | Omicron        | Two dose     | 35.9 (31.5-40.6)     |
| Moderna        | Symptomatic disease        | Omicron        | Boosted      | 46.6 (42.7-50.5)     |
| Pfizer         | Transmission               | Delta          | Waned        | 5 (2.2-10.9)         |
| Pfizer         | Transmission               | Delta          | Two dose     | 21.6 (17.5-26.4)     |
| Pfizer         | Transmission               | Delta          | Boosted      | 41 (31.1-51.6)       |
| Moderna        | Transmission               | Delta          | Waned        | 7.3 (3.9-13.3)       |
| Moderna        | Transmission               | Delta          | Two dose     | 30 (24.3-36.3)       |
| Moderna        | Transmission               | Delta          | Boosted      | 37.6 (29.1-46.8)     |
| <i>Pfizer</i>  | <i>Transmission</i>        | <i>Omicron</i> | <i>Waned</i> | <i>0.6 (0.1-3.5)</i> |
| Pfizer         | Transmission               | Omicron        | Two dose     | 3.2 (1.2-8.5)        |
| Pfizer         | Transmission               | Omicron        | Boosted      | 7.7 (4.2-13.7)       |
| <i>Moderna</i> | <i>Transmission</i>        | <i>Omicron</i> | <i>Waned</i> | <i>0.9 (0.2-4.4)</i> |

It is made available under a [CC-BY-NC-ND 4.0 International license](#) .

|         |              |         |          |                |
|---------|--------------|---------|----------|----------------|
| Moderna | Transmission | Omicron | Two dose | 4.9 (2.1-10.7) |
| Moderna | Transmission | Omicron | Boosted  | 6.7 (3.4-12.7) |
