# Supplementary material for: Validation of neutralizing antibody titers for estimating vaccine effectiveness for the Omicron SARS-CoV-2 variant, BA.1
Source: bioRxiv or medRxiv preprint supplement (doi:10.1101/2021.12.10.21267594), 2023-08-31
Supplement: Supplementary file [file media-1.pdf]

## Supplemental Material

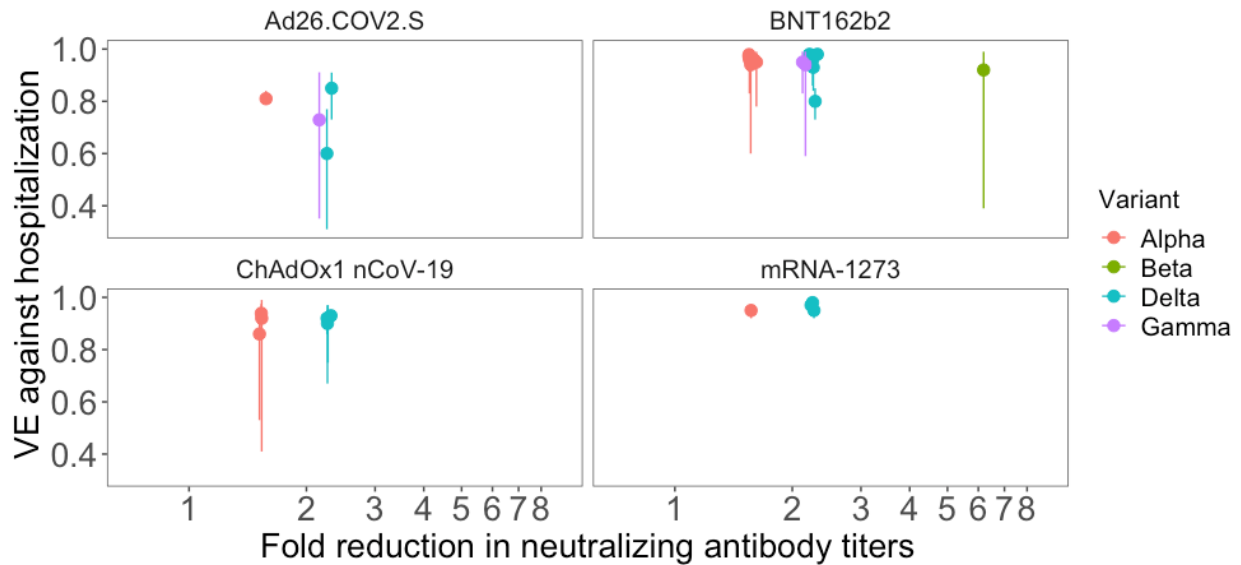

**Fig. S1.** VE against hospitalization by vaccine plotted against variant-specific reductions in neutralizing antibody titers relative to WT virus. Each point (and 95% CI) represents a single estimate of VE for a single vaccine & virus variant from an observational study. Points have been slightly jittered along the x-axis to facilitate presentation.

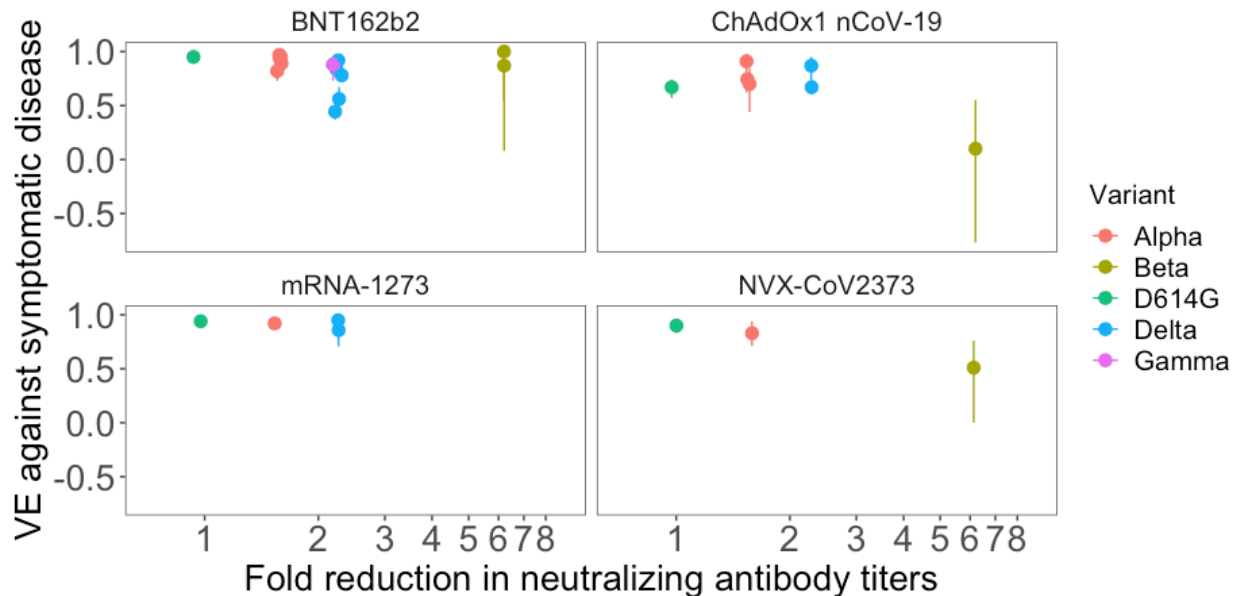

**Fig. S2.** VE against symptomatic disease by vaccine plotted against variant-specific reductions in neutralizing antibody titers relative to WT virus. Each point (and 95% CI) represents a single estimate of VE for a single vaccine & virus variant from an observational study. Points have been slightly jittered along the x-axis to facilitate presentation.

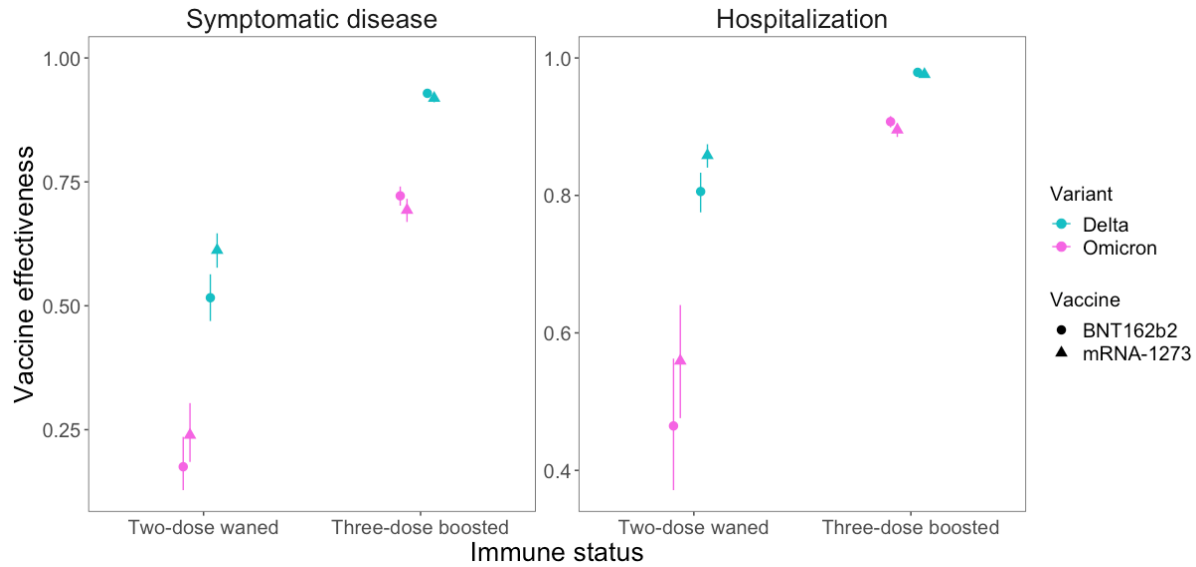

**Fig. S3. Comparison of estimated VE for the Omicron variant and Delta variants for two endpoints, two vaccines, and two immune statuses (6+ months after two doses (Waned) and shortly after a 3<sup>rd</sup> dose (Boosted)).**

**Table S1: Inverse of neutralizing antibody titers relative to WT (1/NATR<sub>var</sub>).**

| Reference | Alpha | Gamma | Delta | Beta | BA.1 | BA.2 | BA.4/5 | BA.1 (Dec. 2021) |
|-----------|-------|-------|-------|------|------|------|--------|------------------|
| 1         | 1.1   | 1.2   | 0     | 4.2  | 0    | 0    | 0      | 0                |
| 2         | 0     | 0     | 0     | 0    | 19.3 | 14   | 23.3   | 0                |
| 3         | 0     | 0     | 0     | 7    | 32.3 | 0    | 0      | 0                |
| 4         | 1.5   | 4     | 0     | 2.5  | 0    | 0    | 0      | 0                |
| 5         | 0     | 0     | 0     | 0    | 0    | 0    | 0      | 41.4             |
| 6         | 0     | 0     | 7.7   | 0    | 0    | 0    | 0      | 0                |
| 7         | 0     | 0     | 0     | 11.4 | 66.3 | 0    | 0      | 0                |
| 8         | 2.5   | 1.1   | 0     | 4.6  | 0    | 0    | 0      | 0                |
| 9         | 2.1   | 6.3   | 0     | 39.4 | 0    | 0    | 0      | 0                |
| 10        | 1.6   | 0     | 3.2   | 13.7 | 68.3 | 0    | 0      | 0                |
| 11        | 0     | 0     | 0     | 0    | 6.2  | 6.2  | 6.2    | 0                |
| 12        | 0     | 0     | 0     | 0    | 9.6  | 8.9  | 0      | 0                |
| 13        | 2.1   | 2.3   | 0     | 12.2 | 0    | 0    | 0      | 0                |
| 14        | 0.8   | 1.2   | 0     | 2.7  | 0    | 0    | 0      | 0                |
| 15        | 0     | 0     | 2     | 6.2  | 12.9 | 0    | 0      | 0                |
| 16        | 1.5   | 2     | 2.2   | 8.8  | 0    | 0    | 0      | 0                |

|    |     |     |     |      |     |     |      |    |
|----|-----|-----|-----|------|-----|-----|------|----|
| 17 | 0   | 0   | 0   | 0    | 7.2 | 5.6 | 9.3  | 0  |
| 18 | 1.5 | 2.2 | 0   | 3.4  | 0   | 0   | 0    | 0  |
| 19 | 0   | 0   | 0   | 0    | 4.9 | 0   | 13.6 | 0  |
| 20 | 1.4 | 1.8 | 0   | 9.1  | 0   | 0   | 0    | 0  |
| 21 | 3.5 | 4.8 | 0   | 12.1 | 0   | 0   | 0    | 0  |
| 22 | 1.9 | 2.3 | 4.4 | 5.3  | 0   | 0   | 0    | 0  |
| 23 | 0   | 0   | 0   | 0    | 0   | 0   | 0    | 37 |
| 24 | 2   | 3.2 | 2.2 | 7.5  | 0   | 0   | 0    | 0  |
| 25 | 0   | 0   | 0   | 0    | 27  | 23  | 0    | 0  |
| 26 | 2.2 | 1.9 | 0   | 4.6  | 0   | 0   | 0    | 0  |

**Table S2: The fitted model for  $\ln(\text{NATR}_{\text{var}})$  with variant a fixed effect and study as a random effect. Alpha was the reference level; the standard deviation of the random effect, study, was 0.51.**

| Predictor         | Estimate | SE   | t-value | P-value |
|-------------------|----------|------|---------|---------|
| Alpha (Intercept) | 0.45     | 0.16 | 2.75    | 0.0087  |
| Gamma             | 0.32     | 0.16 | 2.05    | 0.048   |
| Delta             | 0.37     | 0.23 | 1.63    | 0.11    |
| Beta              | 1.37     | 0.15 | 9.26    | <0.001  |
| BA.1              | 2.47     | 0.22 | 11.06   | <0.001  |
| BA.2              | 2.17     | 0.29 | 7.49    | <0.001  |
| BA.4/5            | 2.54     | 0.31 | 8.25    | <0.001  |
| BA.1 Dec. 2021    | 3.22     | 0.49 | 6.63    | <0.001  |

**Table S3: Estimates of fold reduction in neutralizing antibody titers for virus variants relative to WT ( $\text{NATR}_{\text{var}}$ ) with 95% CIs.**

| Variant          | Fold Reduction (95% CI) |
|------------------|-------------------------|
| Alpha            | 1.57 (1.14-2.16)        |
| Gamma            | 2.15 (1.55-2.99)        |
| Delta            | 2.27 (1.45-3.55)        |
| Beta             | 6.17 (4.58-8.30)        |
| BA.1             | 18.5 (12.8-26.7)        |
| BA.2             | 13.6 (8.3-22.4)         |
| BA.4/5           | 19.9 (11.6-34.1)        |
| BA.1 (Dec. 2021) | 39.1 (16.0-96.0)        |

**Table S4: Vaccine effectiveness against hospitalization estimates used to fit the VE-NATR<sub>tot</sub> model and shown in Figure 2.**

| Variant | Reference     | Vaccine         | VE    | 95% CI    | Effective cases vaccine group | Effective cases control group |
|---------|---------------|-----------------|-------|-----------|-------------------------------|-------------------------------|
| Alpha   | <sup>27</sup> | Ad26.COVS.S     | 0.81  | 0.79-0.84 | 190                           | 1000                          |
| Alpha   | <sup>28</sup> | BNT162b2        | 0.96  | 0.83-0.99 | 1.9                           | 46.9                          |
| Alpha   | <sup>29</sup> | BNT162b2        | 0.979 | 0.91-1    | 2                             | 94                            |
| Alpha   | <sup>29</sup> | ChAdOx1 nCoV-19 | 0.939 | 0.85-0.98 | 5                             | 81.6                          |
| Alpha   | <sup>30</sup> | BNT162b2        | 0.95  | 0.78-0.99 | 1.8                           | 36.6                          |
| Alpha   | <sup>30</sup> | ChAdOx1 nCoV-19 | 0.86  | 0.53-0.96 | 3                             | 21.3                          |
| Alpha   | <sup>31</sup> | BNT162b2        | 0.972 | 0.97-0.98 | 28                            | 1000                          |
| Alpha   | <sup>32</sup> | BNT162b2        | 0.94  | 0.6-0.99  | 1.1                           | 18.6                          |
| Alpha   | <sup>33</sup> | BNT162b2        | 0.96  | 0.94-0.97 | 27.3                          | 681.3                         |
| Alpha   | <sup>33</sup> | mRNA-1273       | 0.95  | 0.92-0.97 | 17.8                          | 356.3                         |
| Alpha   | <sup>33</sup> | ChAdOx1 nCoV-19 | 0.92  | 0.41-0.99 | 1                             | 12.9                          |
| Beta    | <sup>33</sup> | BNT162b2        | 0.92  | 0.39-0.99 | 1                             | 12.4                          |
| Delta   | <sup>27</sup> | Ad26.COVS.S     | 0.85  | 0.73-0.91 | 12.9                          | 85.8                          |
| Delta   | <sup>34</sup> | Ad26.COVS.S     | 0.6   | 0.31-0.77 | 17.8                          | 44.5                          |
| Delta   | <sup>34</sup> | BNT162b2        | 0.8   | 0.73-0.85 | 52.2                          | 261                           |
| Delta   | <sup>34</sup> | mRNA-1273       | 0.95  | 0.92-0.97 | 17.4                          | 347.5                         |
| Delta   | <sup>28</sup> | BNT162b2        | 0.98  | 0.97-0.98 | 20                            | 1000                          |

|       |    |                 |       |           |      |       |
|-------|----|-----------------|-------|-----------|------|-------|
| Delta | 28 | mRNA-1273       | 0.97  | 0.96-0.98 | 30   | 1000  |
| Delta | 28 | ChAdOx1 nCoV-19 | 0.92  | 0.86-0.95 | 13.5 | 169.2 |
| Delta | 29 | BNT162b2        | 0.967 | 0.96-0.97 | 33   | 1000  |
| Delta | 29 | ChAdOx1 nCoV-19 | 0.93  | 0.92-0.94 | 70   | 1000  |
| Delta | 35 | BNT162b2        | 0.93  | 0.84-0.96 | 6    | 85.8  |
| Delta | 36 | BNT162b2        | 0.976 | 0.93-0.99 | 3.3  | 135.6 |
| Delta | 30 | BNT162b2        | 0.96  | 0.86-0.99 | 2.6  | 65    |
| Delta | 30 | ChAdOx1 nCoV-19 | 0.92  | 0.75-0.97 | 3    | 37.7  |
| Delta | 33 | BNT162b2        | 0.98  | 0.96-0.99 | 8.2  | 410.4 |
| Delta | 33 | mRNA-1273       | 0.98  | 0.93-1    | 2.5  | 123.6 |
| Delta | 33 | ChAdOx1 nCoV-19 | 0.9   | 0.67-0.97 | 2.9  | 28.7  |
| Gamma | 28 | BNT162b2        | 0.95  | 0.83-0.99 | 2.7  | 53.6  |
| Gamma | 37 | Ad26.COVS.S     | 0.729 | 0.35-0.91 | 6.2  | 23    |
| Gamma | 33 | BNT162b2        | 0.94  | 0.59-0.99 | 1.1  | 18.3  |

**Table S5: Vaccine effectiveness against symptomatic disease estimates used to fit the VE-NATR<sub>tot</sub> model and shown in Figure 2.**

| Variant | Reference | Vaccine  | VE   | 95% CI    | Effective cases vaccine group | Effective cases control group |
|---------|-----------|----------|------|-----------|-------------------------------|-------------------------------|
| Alpha   | 31        | BNT162b2 | 0.97 | 0.97-0.97 | 30                            | 1000                          |
| Alpha   | 32        | BNT162b2 | 0.82 | 0.73-0.88 | 27.9                          | 155.2                         |
| Alpha   | 33        | BNT162b2 | 0.89 | 0.87-0.9  | 110                           | 1000                          |

|       |    |                    |       |            |       |       |
|-------|----|--------------------|-------|------------|-------|-------|
| Alpha | 33 | mRNA-1273          | 0.92  | 0.88-0.95  | 24.7  | 308.2 |
| Alpha | 33 | ChAdOx1<br>nCoV-19 | 0.91  | 0.62-0.98  | 2     | 22.4  |
| Alpha | 38 | BNT162b2           | 0.937 | 0.92-0.95  | 49.7  | 788.2 |
| Alpha | 29 | BNT162b2           | 0.95  | 0.94-0.96  | 50    | 1000  |
| Alpha | 38 | ChAdOx1<br>nCoV-19 | 0.745 | 0.68-0.79  | 104.5 | 409.7 |
| Alpha | 39 | NVX-CoV2373        | 0.83  | 0.71-0.94  | 14.1  | 82.7  |
| Alpha | 40 | ChAdOx1<br>nCoV-19 | 0.7   | 0.44-0.85  | 12.6  | 42.1  |
| Beta  | 33 | BNT162b2           | 0.87  | 0.08-0.98  | 1.1   | 8.7   |
| Beta  | 33 | BNT162b2           | 1     | 0.54-1     | 0     | 17.8  |
| Beta  | 41 | Ad26.COVS.S        | 0.64  | 0.41-0.79  | 21    | 58.2  |
| Beta  | 42 | NVX-CoV2373        | 0.51  | 0-0.76     | 11.2  | 22.9  |
| Beta  | 43 | ChAdOx1<br>nCoV-19 | 0.1   | -0.77-0.55 | 15.7  | 17.5  |
| D614G | 41 | Ad26.COVS.S        | 0.66  | 0.55-0.75  | 62.2  | 182.9 |
| D614G | 44 | ChAdOx1<br>nCoV-19 | 0.67  | 0.57-0.74  | 81.9  | 248.1 |
| D614G | 45 | CoronaVac          | 0.84  | 0.65-0.92  | 7.5   | 47    |
| D614G | 46 | CoronaVac          | 0.65  | 0.20-0.85  | 7.4   | 21.2  |
| D614G | 47 | mRNA-1273          | 0.94  | 0.89-0.97  | 10.7  | 177.9 |
| D614G | 48 | NVX-CoV2373        | 0.9   | 0.83-0.95  | 14.5  | 145.4 |
| D614G | 49 | BNT162b2           | 0.95  | 0.90-0.98  | 8.2   | 164.2 |
| D614G | 50 | Sputnik V          | 0.92  | 0.86-0.95  | 13.9  | 173.5 |
| Delta | 33 | BNT162b2           | 0.92  | 0.90-0.94  | 69.6  | 869.9 |

|       |    |                 |       |           |       |       |
|-------|----|-----------------|-------|-----------|-------|-------|
| Delta | 33 | mRNA-1273       | 0.95  | 0.91-0.97 | 11.6  | 233   |
| Delta | 33 | ChAdOx1 nCoV-19 | 0.87  | 0.69-0.95 | 5.8   | 44.5  |
| Delta | 38 | BNT162b2        | 0.88  | 0.85-0.90 | 108.3 | 902.5 |
| Delta | 51 | BNT162b2        | 0.444 | 0.37-0.51 | 381   | 685   |
| Delta | 29 | BNT162b2        | 0.835 | 0.83-0.84 | 165   | 1000  |
| Delta | 52 | BNT162b2        | 0.78  | 0.78-0.79 | 220   | 1000  |
| Delta | 51 | mRNA-1273       | 0.739 | 0.66-0.80 | 67.0  | 257   |
| Delta | 38 | ChAdOx1 nCoV-19 | 0.67  | 0.61-0.72 | 201.2 | 609.8 |
| Gamma | 33 | BNT162b2        | 0.88  | 0.73-0.94 | 6.4   | 53.3  |

**Table S6: Predicted VE, 95% CIs and 95% PIs for two vaccines, two variants, two endpoints, and two immune statuses using the model shown in Figure 2.**

| Variant | Prediction | Vaccine   | Endpoint            | Status             | VE   | 95% PI     | 95% CI    |
|---------|------------|-----------|---------------------|--------------------|------|------------|-----------|
| Omicron | Updated    | mRNA-1273 | Hospitalization     | Three-dose boosted | 0.9  | 0.82-0.95  | 0.89-0.91 |
| Omicron | Updated    | BNT162b2  | Hospitalization     | Three-dose boosted | 0.91 | 0.84-0.96  | 0.9-0.92  |
| Omicron | Updated    | mRNA-1273 | Hospitalization     | Two-dose waned     | 0.56 | 0.37-0.71  | 0.48-0.64 |
| Omicron | Updated    | BNT162b2  | Hospitalization     | Two-dose waned     | 0.46 | 0.25-0.63  | 0.37-0.56 |
| Omicron | Updated    | mRNA-1273 | Symptomatic disease | Three-dose boosted | 0.69 | 0.56-0.8   | 0.67-0.72 |
| Omicron | Updated    | BNT162b2  | Symptomatic disease | Three-dose boosted | 0.72 | 0.6-0.82   | 0.7-0.74  |
| Omicron | Updated    | mRNA-1273 | Symptomatic disease | Two-dose waned     | 0.24 | -0.01-0.43 | 0.18-0.3  |
| Omicron | Updated    | BNT162b2  | Symptomatic disease | Two-dose waned     | 0.18 | -0.09-0.38 | 0.13-0.24 |

|         |              |           |                     |                    |      |            |           |
|---------|--------------|-----------|---------------------|--------------------|------|------------|-----------|
| Omicron | Updated      | mRNA-1273 | All infections      | Three-dose boosted | 0.69 | 0.56-0.8   | 0.66-0.72 |
| Omicron | Updated      | BNT162b2  | All infections      | Three-dose boosted | 0.71 | 0.57-0.81  | 0.68-0.73 |
| Omicron | Updated      | mRNA-1273 | All infections      | Two-dose waned     | 0.44 | 0.21-0.62  | 0.33-0.55 |
| Omicron | Updated      | BNT162b2  | All infections      | Two-dose waned     | 0.38 | 0.14-0.59  | 0.27-0.52 |
| Omicron | Dec. 11 2021 | mRNA-1273 | Hospitalization     | Three-dose boosted | 0.83 | 0.73-0.91  | 0.81-0.85 |
| Omicron | Dec. 11 2021 | BNT162b2  | Hospitalization     | Three-dose boosted | 0.85 | 0.76-0.92  | 0.83-0.87 |
| Omicron | Dec. 11 2021 | mRNA-1273 | Hospitalization     | Two-dose waned     | 0.42 | 0.19-0.6   | 0.33-0.52 |
| Omicron | Dec. 11 2021 | BNT162b2  | Hospitalization     | Two-dose waned     | 0.33 | 0.08-0.53  | 0.24-0.44 |
| Omicron | Dec. 11 2021 | mRNA-1273 | Symptomatic disease | Three-dose boosted | 0.56 | 0.39-0.7   | 0.52-0.6  |
| Omicron | Dec. 11 2021 | BNT162b2  | Symptomatic disease | Three-dose boosted | 0.59 | 0.43-0.72  | 0.56-0.63 |
| Omicron | Dec. 11 2021 | mRNA-1273 | Symptomatic disease | Two-dose waned     | 0.15 | -0.11-0.36 | 0.11-0.21 |
| Omicron | Dec. 11 2021 | BNT162b2  | Symptomatic disease | Two-dose waned     | 0.11 | -0.17-0.32 | 0.07-0.16 |
| Omicron | Dec. 11 2021 | mRNA-1273 | All infections      | Three-dose boosted | 0.62 | 0.46-0.75  | 0.57-0.67 |
| Omicron | Dec. 11 2021 | BNT162b2  | All infections      | Three-dose boosted | 0.64 | 0.49-0.76  | 0.6-0.68  |
| Omicron | Dec. 11 2021 | mRNA-1273 | All infections      | Two-dose waned     | 0.36 | 0.12-0.57  | 0.24-0.51 |
| Omicron | Dec. 11 2021 | BNT162b2  | All infections      | Two-dose waned     | 0.31 | 0.06-0.54  | 0.2-0.47  |
| Delta   | Delta        | mRNA-1273 | Hospitalization     | Three-dose boosted | 0.98 | 0.94-1     | 0.97-0.98 |
| Delta   | Delta        | BNT162b2  | Hospitalization     | Three-dose boosted | 0.98 | 0.95-1     | 0.97-0.98 |
| Delta   | Delta        | mRNA-1273 | Hospitalization     | Two-dose waned     | 0.86 | 0.77-0.93  | 0.84-0.87 |
| Delta   | Delta        | BNT162b2  | Hospitalization     | Two-dose waned     | 0.81 | 0.7-0.89   | 0.78-0.83 |



|       |       |           |                     |                    |      |           |           |
|-------|-------|-----------|---------------------|--------------------|------|-----------|-----------|
| Delta | Delta | mRNA-1273 | Symptomatic disease | Three-dose boosted | 0.92 | 0.86-0.97 | 0.91-0.93 |
| Delta | Delta | BNT162b2  | Symptomatic disease | Three-dose boosted | 0.93 | 0.87-0.97 | 0.92-0.94 |
| Delta | Delta | mRNA-1273 | Symptomatic disease | Two-dose waned     | 0.61 | 0.45-0.74 | 0.58-0.65 |
| Delta | Delta | BNT162b2  | Symptomatic disease | Two-dose waned     | 0.52 | 0.33-0.66 | 0.47-0.56 |
| Delta | Delta | mRNA-1273 | All infections      | Three-dose boosted | 0.84 | 0.74-0.92 | 0.8-0.88  |
| Delta | Delta | BNT162b2  | All infections      | Three-dose boosted | 0.85 | 0.75-0.93 | 0.81-0.89 |
| Delta | Delta | mRNA-1273 | All infections      | Two-dose waned     | 0.65 | 0.5-0.77  | 0.61-0.69 |
| Delta | Delta | BNT162b2  | All infections      | Two-dose waned     | 0.6  | 0.43-0.73 | 0.54-0.66 |

**Table S7: VE validation data for the Omicron variant shown in Figure 3 for two vaccines, two endpoints, and two immune statuses (two-dose waned and boosted with a third dose).**

| Reference | Vaccine   | Dose               | Endpoint        | VE   | CI          | Estimated cases vaccine group | Estimated cases control group |
|-----------|-----------|--------------------|-----------------|------|-------------|-------------------------------|-------------------------------|
| 53        | mRNA-1273 | Three-dose boosted | Hospitalization | 97.5 | 96.3 - 98.3 | 25.9                          | 1037                          |
| 54        | BNT162b2  | Two-dose waned     | Hospitalization | 51.6 | 47.2 - 55.6 | 776.8                         | 1604.9                        |
| 54        | BNT162b2  | Three-dose boosted | Hospitalization | 88.8 | 87.3 - 90.1 | 273.1                         | 2438.4                        |
| 54        | mRNA-1273 | Three-dose boosted | Hospitalization | 90.2 | 87.3 - 92.5 | 60.7                          | 618.9                         |
| 55        | BNT162b2  | Two-dose waned     | Hospitalization | 34.9 | 17.7 - 48.4 | 116.2                         | 178.5                         |

|    |           |                    |                     |      |             |         |         |
|----|-----------|--------------------|---------------------|------|-------------|---------|---------|
| 56 | BNT162b2  | Two-dose waned     | Symptomatic disease | 8.8  | 7 - 10.5    | 20033.7 | 21966.8 |
| 56 | BNT162b2  | Three-dose boosted | Symptomatic disease | 67.2 | 66.5 - 67.8 | 12151   | 37045.9 |
| 56 | mRNA-1273 | Two-dose waned     | Symptomatic disease | 14.9 | 2.9 - 24.7  | 426.3   | 500.9   |
| 56 | mRNA-1273 | Three-dose boosted | Symptomatic disease | 66.3 | 63.7 - 68.8 | 902.5   | 2678    |

## References

- 1 Anichini G, Terrosi C, Gori Savellini G, Gandolfo C, Franchi F, Cusi MG. Neutralizing Antibody Response of Vaccinees to SARS-CoV-2 Variants. *Vaccines* 2021; **9**: 517.
- 2 Bowen JE, Addetia A, Dang HV, *et al.* Omicron spike function and neutralizing activity elicited by a comprehensive panel of vaccines. *Science* 2022; **377**: 890–4.
- 3 Cameroni E, Bowen JE, Rosen LE, *et al.* Broadly neutralizing antibodies overcome SARS-CoV-2 Omicron antigenic shift. *Nature* 2022; **602**: 664–70.
- 4 Cantoni D, Siracusano G, Mayora-Neto M, *et al.* Analysis of Antibody Neutralisation Activity against SARS-CoV-2 Variants and Seasonal Human Coronaviruses NL63, HKU1, and 229E Induced by Three Different COVID-19 Vaccine Platforms. *Vaccines* 2022; **11**: 58.
- 5 Cele S, Jackson L, Khoury DS, *et al.* SARS-CoV-2 Omicron has extensive but incomplete escape of Pfizer BNT162b2 elicited neutralization and requires ACE2 for infection. *Infectious Diseases (except HIV/AIDS)*, 2021 DOI:10.1101/2021.12.08.21267417.
- 6 Davis C, Logan N, Tyson G, *et al.* Reduced neutralisation of the Delta (B.1.617.2) SARS-CoV-2 variant of concern following vaccination. *Infectious Diseases (except HIV/AIDS)*, 2021 DOI:10.1101/2021.06.23.21259327.
- 7 Doria-Rose NA, Shen X, Schmidt SD, *et al.* Booster of mRNA-1273 Strengthens SARS-CoV-2 Omicron Neutralization. *Infectious Diseases (except HIV/AIDS)*, 2021 DOI:10.1101/2021.12.15.21267805.
- 8 Dupont L, Snell LB, Graham C, *et al.* Neutralizing antibody activity in convalescent sera from infection in humans with SARS-CoV-2 and variants of concern. *Nat Microbiol* 2021; **6**: 1433–42.

- 9 Garcia-Beltran WF, St. Denis KJ, Hoelzemer A, *et al.* mRNA-based COVID-19 vaccine boosters induce neutralizing immunity against SARS-CoV-2 Omicron variant. *Cell* 2022; **185**: 457-466.e4.
- 10 Gruell H, Vanshylla K, Tober-Lau P, *et al.* mRNA booster immunization elicits potent neutralizing serum activity against the SARS-CoV-2 Omicron variant. *Nat Med* 2022; **28**: 477–80.
- 11 Hachmann NP, Miller J, Collier AY, Barouch DH. Neutralization Escape by SARS-CoV-2 Omicron Subvariant BA.4.6. *n engl j med* 2022; : 3.
- 12 Iketani S, Liu L, Guo Y, *et al.* Antibody evasion properties of SARS-CoV-2 Omicron sublineages. *Nature* 2022; **604**: 553–6.
- 13 Leier HC, Bates TA, Lyski ZL, *et al.* Previously infected vaccinees broadly neutralize SARS-CoV-2 variants. *Infectious Diseases (except HIV/AIDS)*, 2021  
DOI:10.1101/2021.04.25.21256049.
- 14 Liu Y, Liu J, Xia H, *et al.* Neutralizing Activity of BNT162b2-Elicited Serum. *The new england journal of medicine* 2021.
- 15 Lu L, Mok BWY, Chen LL, *et al.* Neutralization of Severe Acute Respiratory Syndrome Coronavirus 2 Omicron Variant by Sera From BNT162b2 or CoronaVac Vaccine Recipients. *Clinical Infectious Diseases* 2022; **75**: e822–6.
- 16 Lustig Y, Zuckerman N, Nemet I, *et al.* Neutralising capacity against Delta (B.1.617.2) and other variants of concern following Comirnaty (BNT162b2, BioNTech/Pfizer) vaccination in health care workers, Israel. *Eurosurveillance* 2021; **26**. DOI:10.2807/1560-7917.ES.2021.26.26.2100557.
- 17 Lyke KE, Atmar RL, Islas CD, *et al.* Rapid decline in vaccine-boosted neutralizing antibodies against SARS-CoV-2 Omicron variant. *Cell Reports Medicine* 2022; **3**: 100679.
- 18 McCallum M, Bassi J, De Marco A, *et al.* SARS-CoV-2 immune evasion by the B.1.427/B.1.429 variant of concern. *Science* 2021; **373**: 648–54.
- 19 Qu P, Faraone JN, Evans JP, *et al.* Durability of Booster mRNA Vaccine against SARS-CoV-2 BA.2.12.1, BA.4, and BA.5 Subvariants. *n engl j med* 2022; : 3.
- 20 Su D, Li X, He C, *et al.* Broad neutralization against SARS-CoV-2 variants induced by a modified B.1.351 protein-based COVID-19 vaccine candidate. *bioRxiv* 2021; : 2021.05.16.444369.
- 21 Tang J, Lee Y, Ravichandran S, *et al.* Reduced neutralization of SARS-CoV-2 variants by convalescent plasma and hyperimmune intravenous immunoglobulins for treatment of COVID-19. *bioRxiv* 2021; : 2021.03.19.436183.

- 22 van Gils MJ, Lavell AHA, van der Straten K, *et al.* Four SARS-CoV-2 vaccines induce quantitatively different antibody responses against SARS-CoV-2 variants. *Infectious Diseases (except HIV/AIDS)*, 2021 DOI:10.1101/2021.09.27.21264163.
- 23 Wilhelm A, Widera M, Grikscheit K, *et al.* Reduced Neutralization of SARS-CoV-2 Omicron Variant by Vaccine Sera and Monoclonal Antibodies. *Infectious Diseases (except HIV/AIDS)*, 2021 DOI:10.1101/2021.12.07.21267432.
- 24 Wu K, Werner AP, Moliva JI, *et al.* mRNA-1273 vaccine induces neutralizing antibodies against spike mutants from global SARS-CoV-2 variants. *Immunology*, 2021 DOI:10.1101/2021.01.25.427948.
- 25 Yu J, Collier AY, Rowe M, *et al.* Neutralization of the SARS-CoV-2 Omicron BA.1 and BA.2 Variants. *N Engl J Med* 2022; **386**: 1579–80.
- 26 Yu X, Wei D, Xu W, *et al.* Neutralizing activity of BBIBP-CorV vaccine-elicited sera against Beta, Delta and other SARS-CoV-2 variants of concern. *Nature Communications* 2022; **13**: 1788.
- 27 Polinski JM, Weckstein AR, Batech M, *et al.* Effectiveness of the Single-Dose Ad26.COV2.S COVID Vaccine. *Infectious Diseases (except HIV/AIDS)*, 2021 DOI:10.1101/2021.09.10.21263385.
- 28 Skowronski DM, Setayeshgar S, Febriani Y, *et al.* Two-dose SARS-CoV-2 vaccine effectiveness with mixed schedules and extended dosing intervals: test-negative design studies from British Columbia and Quebec, Canada. *medRxiv* 2021; : 2021.10.26.21265397.
- 29 Andrews N, Tessier E, Stowe J, *et al.* Vaccine effectiveness and duration of protection of Comirnaty, Vaxzevria and Spikevax against mild and severe COVID-19 in the UK. *Epidemiology*, 2021 DOI:10.1101/2021.09.15.21263583.
- 30 Stowe J, Andrews N, Gower C, *et al.* Effectiveness of COVID-19 vaccines against hospital admission with the Delta (B.1.617.2) variant. 2021.
- 31 Haas EJ, Angulo FJ, McLaughlin JM, *et al.* Impact and effectiveness of mRNA BNT162b2 vaccine against SARS-CoV-2 infections and COVID-19 cases, hospitalisations, and deaths following a nationwide vaccination campaign in Israel: an observational study using national surveillance data. *The Lancet* 2021; **397**: 1819–29.
- 32 Martínez-Baz I, Miqueleiz A, Casado I, *et al.* Effectiveness of COVID-19 vaccines in preventing SARS-CoV-2 infection and hospitalisation, Navarre, Spain, January to April 2021. *Eurosurveillance* 2021; **26**. DOI:10.2807/1560-7917.ES.2021.26.21.2100438.
- 33 Nasreen S, Chung H, He S, *et al.* Effectiveness of COVID-19 vaccines against symptomatic SARS-CoV-2 infection and severe outcomes with variants of concern in Ontario. *Nat Microbiol* 2022; **7**: 379–85.

- 34 Bajema KL, Dahl RM, Prill MM, *et al.* Effectiveness of COVID-19 mRNA Vaccines Against COVID-19–Associated Hospitalization — Five Veterans Affairs Medical Centers, United States, February 1–August 6, 2021. *MMWR Morb Mortal Wkly Rep* 2021; **70**: 1294–9.
- 35 Tartof SY, Slezak JM, Fischer H, *et al.* Effectiveness of mRNA BNT162b2 COVID-19 vaccine up to 6 months in a large integrated health system in the USA: a retrospective cohort study. *The Lancet* 2021; : S0140673621021838.
- 36 Bruxvoort KJ, Sy LS, Qian L, *et al.* Effectiveness of mRNA-1273 against Delta, Mu, and other emerging variants. *medRxiv* 2021; : 2021.09.29.21264199.
- 37 Ranzani OT, dos Santos Leite R, Castilho LD, *et al.* Vaccine effectiveness of Ad26.COV2.S against symptomatic COVID-19 and clinical outcomes in Brazil: a test-negative study design. *medRxiv* 2021; : 2021.10.15.21265006.
- 38 Lopez Bernal J, Andrews N, Gower C, *et al.* Effectiveness of Covid-19 Vaccines against the B.1.617.2 (Delta) Variant. *N Engl J Med* 2021; **385**: 585–94.
- 39 Heath PT, Galiza EP, Baxter DN, *et al.* Safety and Efficacy of NVX-CoV2373 Covid-19 Vaccine. *N Engl J Med* 2021; **385**: 1172–83.
- 40 Emary KRW, Golubchik T, Aley PK, *et al.* Efficacy of ChAdOx1 nCoV-19 (AZD1222) vaccine against SARS-CoV-2 VOC 202012/01 (B.1.1.7). *SSRN Journal* 2021. DOI:10.2139/ssrn.3779160.
- 41 Sadoff J, Gray G, Vandebosch A, *et al.* Safety and Efficacy of Single-Dose Ad26.COV2.S Vaccine against Covid-19. *N Engl J Med* 2021; **384**: 2187–201.
- 42 Shinde V, Bhikha S, Hoosain Z, *et al.* Efficacy of NVX-CoV2373 Covid-19 Vaccine against the B.1.351 Variant. *N Engl J Med* 2021; **384**: 1899–909.
- 43 Al Kaabi N, Zhang Y, Xia S, *et al.* Effect of 2 Inactivated SARS-CoV-2 Vaccines on Symptomatic COVID-19 Infection in Adults: A Randomized Clinical Trial. *JAMA* 2021; **326**: 35.
- 44 Voysey M, Clemens SAC, Madhi SA, *et al.* Safety and efficacy of the ChAdOx1 nCoV-19 vaccine (AZD1222) against SARS-CoV-2: an interim analysis of four randomised controlled trials in Brazil, South Africa, and the UK. *The Lancet* 2021; **397**: 99–111.
- 45 Tanriover MD, Doğanay HL, Akova M, *et al.* Efficacy and safety of an inactivated whole-virion SARS-CoV-2 vaccine (CoronaVac): interim results of a double-blind, randomised, placebo-controlled, phase 3 trial in Turkey. *The Lancet* 2021; **398**: 213–22.
- 46 Jakarta WSICI. Indonesia grants emergency approval for Sinovac vaccine. *The Straits Times*. 2021; published online Jan 12. <https://www.straitstimes.com/asia/se-asia/indonesia-grants-emergency-approval-for-sinovac-vaccine> (accessed March 30, 2023).

- 47 Baden LR, El Sahly HM, Essink B, *et al.* Efficacy and Safety of the mRNA-1273 SARS-CoV-2 Vaccine. *N Engl J Med* 2021; **384**: 403–16.
- 48 Novavax COVID-19 Vaccine Demonstrates 90% Overall Efficacy and 100% Protection Against Moderate and Severe Disease in PREVENT-19 Phase 3 Trial. Novavax Investor Relations. <https://ir.novavax.com/2021-06-14-Novavax-COVID-19-Vaccine-Demonstrates-90-Overall-Efficacy-and-100-Protection-Against-Moderate-and-Severe-Disease-in-PREVENT-19-Phase-3-Trial> (accessed March 30, 2023).
- 49 Polack FP, Thomas SJ, Kitchin N, *et al.* Safety and Efficacy of the BNT162b2 mRNA Covid-19 Vaccine. *N Engl J Med* 2020; **383**: 2603–15.
- 50 Logunov DY, Dolzhikova IV, Shcheblyakov DV, *et al.* Safety and efficacy of an rAd26 and rAd5 vector-based heterologous prime-boost COVID-19 vaccine: an interim analysis of a randomised controlled phase 3 trial in Russia. *The Lancet* 2021; **397**: 671–81.
- 51 Tang P, Hasan MR, Chemaitelly H, *et al.* BNT162b2 and mRNA-1273 COVID-19 vaccine effectiveness against the SARS-CoV-2 Delta variant in Qatar. *Nat Med* 2021; **27**: 2136–43.
- 52 Nordström P, Ballin M, Nordström A. Effectiveness of heterologous ChAdOx1 nCoV-19 and mRNA prime-boost vaccination against symptomatic Covid-19 infection in Sweden: A nationwide cohort study. *The Lancet Regional Health - Europe* 2021; **11**: 100249.
- 53 Tseng HF, Ackerson BK, Luo Y, *et al.* Effectiveness of mRNA-1273 against SARS-CoV-2 Omicron and Delta variants. *Nat Med* 2022; **28**: 1063–71.
- 54 Hansen C, Schelde A, Moustsen-Helm I, *et al.* Vaccine effectiveness against infection and COVID-19-associated hospitalisation with the Omicron (B.1.1.529) variant after vaccination with the BNT162b2 or mRNA-1273 vaccine: A nationwide Danish cohort study. *Research Square* 2022; published online March 30. DOI:10.21203/rs.3.rs-1486018/v1.
- 55 SARS-CoV-2 variants of concern and variants under investigation. 2021; published online Dec 31.
- 56 Andrews N, Stowe J, Kirsebom F, *et al.* Covid-19 Vaccine Effectiveness against the Omicron (B.1.1.529) Variant. *N Engl J Med* 2022; **386**: 1532–46.
